- microsomal enzyme induction. *Pharmacol Rev* 19:317, 1967
16. Oswald I: Drugs and sleep. *Pharmacol Rev* 20:273, 1968
  17. Oswald I, Berger RJ, Jaramillo RA, *et al.*: Melancholia and barbiturates: A controlled EEG, body and eye movement study of sleep. *Brit J Psychiat* 109:66, 1963
  18. Clesmes SR, Dement WC: Effect of REM sleep deprivation on psychological functioning. *J Nerv Ment Dis* 144:485, 1967
  19. Williams HL, Williams CL: Nocturnal EEG profiles and performance. *Psychophysiology* 3:164, 1966
  20. Baekeland F: Pentobarbital and dextroamphetamine: Effects on the sleep cycle in man. *Psychopharmacologia* 11:388, 1967
  21. Hinton JM: The clinical evaluation of hypnotics, *International Encyclopedia on Pharmacology and Therapeutics*. Section 6, vol 1. New York, Pergamon, 1966, p 33
  22. Lasagna L: The pharmacological basis for the effective use of hypnotics, *Pharmacology for Physicians*. Vol 1, no 2, February 1967
  23. Mark LC: Archaic classification of barbiturates. *Clin Pharmacol Ther* 10:287, 1969
  24. Bush MT, Berry G, Hume A: Ultra-short acting barbiturates as oral hypnotic agents in man. *Clin Pharmacol Ther* 7:373, 1966
  25. Clarke RSJ (Editor): Never intravenous anesthetics. *Int Anesth Clin* 7: no. 1, 1969
  26. Mark LC, Papper EM: Changing therapeutic goals in barbiturate poisoning, *Pharmacology for Physicians*. Vol 1, no 3, March 1967
  27. Modell W: Drug induced diseases. *Ann Rev Pharmacol* 5:285, 1965
  28. Mullen JO, Fouts JR: Prolongation of hexobarbital sleeping time and inhibition of hepatic drug metabolism by adrenergic blocking agents in mice. *Biochem Pharmacol* 14: 305, 1965
  29. Kramer JC: Introduction to amphetamine abuse. *J Psychedelic Drugs* 2:1, 1969
  30. Brand L, Mark LC, Burns JJ, *et al.*: Physiological disposition of methitalur in man. *Med Exp* 1:339, 1959
  31. Brand L, Mark LC, Snell MMcM, *et al.*: Physiological disposition of methohexital in man. *ANESTHESIOLOGY* 24:331, 1963
  32. Brodie BB, Mark LC, Papper EM, *et al.*: The fate of thiopental in man and a method for its estimation in biological materials. *J Pharmacol Exp Ther* 98:85, 1950
  33. Brodie BB: Physiological disposition and chemical fate of thiobarbiturates in the body. *Fed Proc* 11:632, 1952
  34. Fazekas JF, Goldbaum LR, Koppanyi T, *et al.*: Study on the effect of overdose of pentyl-enetetrazole and barbiturate combinations in human volunteers. *Amer J Med Sci* 231: 531, 1956
  35. Brodie BB, Burns JJ, Mark LC, *et al.*: The fate of pentobarbital in man and dog and a method for its estimation in biological materials. *J Pharmacol Exp Ther* 109:26, 1953
  36. Butler TC, Mahaffee C, Waddell WJ: Phenobarbital: Studies of elimination, accumulation, tolerance and dosage schedules. *J Pharmacol Exp Ther* 111:425, 1954

### Pediatrics

**LARYNGEAL EDEMA** In the postanesthetic period, laryngeal edema and tracheitis with obstructive croup-like symptoms occur in some children who undergo intubation for surgery. In some children the obstruction progresses despite the usual therapy with cool humidification and corticosteroid therapy and requires more active means to establish a normal airway. Positive-pressure assistance to ventilation and nebulization of racemic epinephrine have been effective in relieving the obstruction in all children with this complication without recourse to reintubation or tracheotomy. (*Jordan, W. S., and others: New Therapy for Postintubation Laryngeal Edema and Tracheitis in Children, J.A.M.A. 212: 585 (April) 1970.*)

**MAGNESIUM SULFATE** During a 14-year period, 7,000 infants were born of mothers who had received magnesium sulfate parenterally for treatment of pre-eclampsia or eclampsia. Magnesium sulfate was administered intramuscularly in doses of 30 to 40 g/24 hours and was maintained for as long as necessary provided reflexes remained active, urinary output exceeded 100 ml/4 hours, and respiration was not depressed. Magnesium levels in umbilical cord blood of 118 infants and in 42 mothers were determined. The level of magnesium in the serum of the fetus rapidly approached that of the mother, but was not associated with any deleterious effects upon either fetus or newborn. (*Stone, S. R., and Pritchard, J. A.: Effect of Maternally Administered Magnesium Sulfate on the Neonate, Obstet. Gynec. 35: 374 (April) 1970.*)
